# Supplementary material
Source: PubMed Central journal article supplement (PMC4900891)
Supplement: NIHMS791232-supplement-Figure_S1.pdf [file NIHMS791232-supplement-Figure_S1.pdf]

# Structural and Functional Consequences of Three Cancer-Associated Mutations in the Oncogenic Phosphatase Shp2

Jonathan R. LaRoche<sup>†‡</sup>, Michelle Fodor,<sup>#</sup> Xiang Xu,<sup>†‡</sup> Izabela Durzynska,<sup>†‡</sup> Lixin Fan,<sup>¶</sup> Travis Stams,<sup>#</sup> Ho Man Chan,<sup>\*\*</sup> Matthew J. LaMarche,<sup>\*</sup> Raj Chopra,<sup>#</sup> Ping Wang,<sup>\*\*</sup> Pascal D. Fortin,<sup>\*\*</sup> Michael G. Acker,<sup>\*\*</sup> and Stephen C. Blacklow<sup>†‡</sup>

<sup>†</sup> Department of Biological Chemistry & Molecular Pharmacology, Harvard Medical School, Boston, MA 02115, USA

<sup>‡</sup> Department of Cancer Biology, Dana-Farber Cancer Institute, Boston, MA 02215, USA

<sup>\*</sup> Center for Proteomic Chemistry, <sup>\*\*</sup>Oncology, <sup>\*</sup>Global Discovery Chemistry, Novartis Institutes for Biomedical Research, Cambridge, MA, 02139, USA

<sup>¶</sup> Basic Science Program, Leidos Biomedical Research, Inc., Frederick National Laboratory for Cancer Research, Frederick, MD 21702, USA

## SUPPLEMENTARY INFORMATION

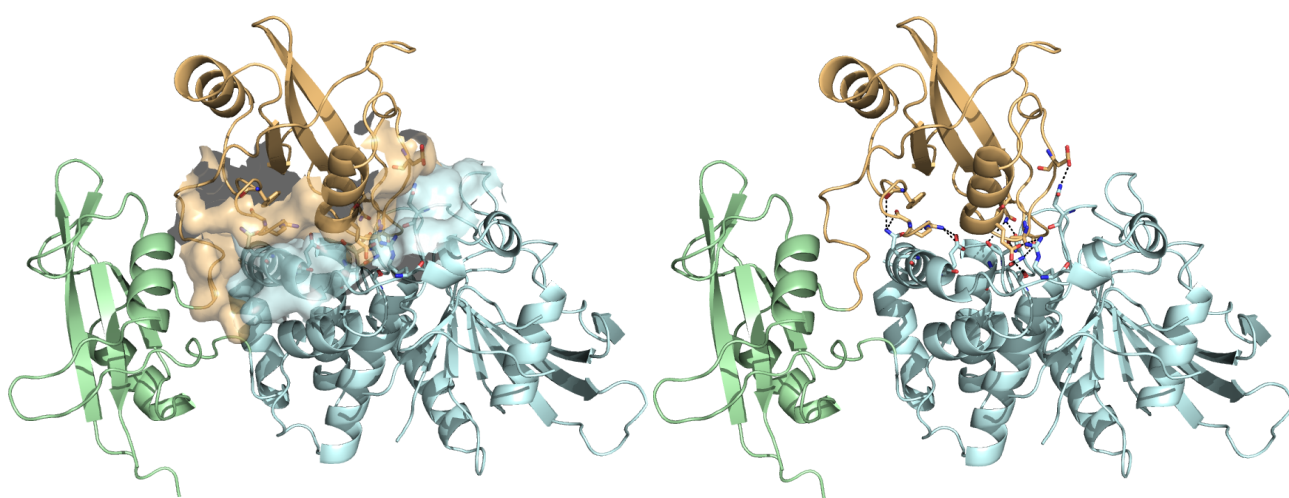

### Hydrogen Bonds

|                            |
|----------------------------|
| GLN256 (NE2) : ARG4 (O)    |
| GLN256 (NE2) : PHE7 (O)    |
| GLN510 (NE2) : GLY60 (O)   |
| ASN281 (ND2) : GLU69 (OE1) |
| GLN506 (NE2) : ALA72 (O)   |
| SER502 (HG) : GLU76 (OE2)  |
| GLN256 (OE1) : ARG4 (HE)   |
| GLN506 (O) : ASN58 (ND2)   |
| GLN506 (OE1) : ASN58 (ND2) |

### Salt Bridge Interactions

|                            |
|----------------------------|
| ARG265 (NH2) : GLU76 (OE1) |
| GLU258 (OE2) : ARG4 (NH1)  |
| GLU258 (OE1) : ARG4 (NH1)  |

**Supplemental Figure 1.** The buried surface area between N-SH2 and PTP domains involves 70 residues (32 from N-SH2 and 38 from PTP) and covers 1176 Å<sup>2</sup>. There are 9 hydrogen bond and 3 salt bridge contributions to this interface. PDB: 2SHP and QtPISA<sup>1</sup> were used for this analysis.

## References

- [1] Krissinel, E., and Henrick, K. (2007) Inference of macromolecular assemblies from crystalline state, *J Mol Biol* 372, 774-797.
